## Phylogenetic Origins of the Himalayan Endemic *Dolomiaea*, *Diplazoptilon* and *Xanthopappus* (Asteraceae: Cardueae) Based on Three DNA Regions

YU-JIN WANG<sup>1,2</sup>, JIAN-QUAN LIU<sup>1,3,\*</sup> and GEORG MIEHE<sup>4</sup>

<sup>1</sup>Key Laboratory of Qinghai–Tibetan Plateau Ecological Adaptation, Northwest Plateau Institute of Biology, Chinese Academy of Sciences, Xining 810008, Qinghai, China, <sup>2</sup>Graduate School of Chinese Academy of Sciences, Beijing 100039, China, <sup>3</sup>Key Laboratory of Arid and Grassland Ecology, Lanzhou University, Lanzhou 730000, Gansu, China and <sup>4</sup>Faculty of Geography, University of Marburg, Deutschhastr. 10, D-35032 Marburg, Germany

Received: 10 April 2006 Returned for revision: 4 July 2006 Accepted: 17 October 2006 Published electronically: 11 January 2007

• **Background and Aims** It is an enduring question as to the mechanisms leading to the high diversity and the processes producing endemics with unusual morphologies in the Himalayan alpine region. In the present study, the phylogenetic relationships and origins of three such endemic genera were analysed, *Dolomiaea*, *Diplazoptilon* and *Xanthopappus*, all in the tribe Cardueae of Asteraceae.

• **Methods** The nuclear rDNA internal transcribed spacer (ITS) and plastid *trnL-F* and *psbA-trnH* regions of these three genera were sequenced. The same regions for other related genera in Cardueae were also sequenced or downloaded from GenBank. Phylogenetic trees were constructed from individual and combined data sets of the three types of sequences using maximum parsimony, maximum likelihood and Bayesian analyses.

• **Key Results** The phylogenetic tree obtained allowed earlier hypotheses concerning the relationships of these three endemic genera based on gross morphology to be rejected. *Frolovia* and *Saussurea costus* were deeply nested within *Dolomiaea*, and the strong statistical support for the *Dolomiaea*–*Frolovia* clade suggested that circumscription of *Dolomiaea* should be more broadly redefined. *Diplazoptilon* was resolved as sister to *Himalaiella*, and these two together are sister to *Lipschitzia*. The clade comprising these three genera is sister to *Jurinea*, and together these four genera are sister to the *Dolomiaea*–*Frolovia* clade. *Xanthopappus*, previously hypothesized to be closely related to *Carduus*, was found to be nested within a well-supported but not fully resolved *Onopordum* group with *Alfredia*, *Ancathia*, *Lamyropappus*, *Olgaea*, *Synurus* and *Syreitschikovia*, rather than the *Carduus* group. The crude dating based on ITS sequence divergence revealed that the divergence time of *Dolomiaea*–*Frolovia* from its sister group probably occurred 13.6–12.2 million years ago (Ma), and the divergence times of the other two genera, *Xanthopappus* and *Diplazoptilon*, from their close relatives around 5.7–4.7 Ma and 2.0–1.6 Ma, respectively.

• **Conclusions** The findings provide an improved understanding of the intergeneric relationships in Cardueae. The crude calibration of lineages indicates that the uplifts of the Qinghai–Tibetan Plateau since the Miocene might have served as a continuous stimulus for the production of these morphologically aberrant endemic elements of the Himalayan flora.

**Key words:** Cardueae, *Dolomiaea*, *Diplazoptilon*, *Xanthopappus*, Himalayas, origin, phylogeny, taxonomy.

### INTRODUCTION

The Qinghai–Tibetan Plateau (QTP) is the highest and largest plateau in the world, having a mean elevation of >4.0 km and an area of about  $2.5 \times 10^6$  km<sup>2</sup> (Zheng, 1996). Plants occurring there comprise major components of the Himalayan alpine flora (Wu, 1987; Wu *et al.*, 1995). This region, with southeast China, forms the Himalayan biodiversity hotspot, and has been designated as one of the 34 most important centres of biodiversity because of its high species richness and abundance of endemic species (Wilson, 1992; Myers *et al.*, 2000). The mechanisms leading to this high diversity and the processes producing endemics, often with unusual morphologies, have been the subject of much interest (Wulff, 1943; Wu, 1987; Wu *et al.*, 1995; Liu *et al.*, 2002, 2006).

Cardueae *sensu lato* (*s.l.*) is a large tribe of the family Asteraceae, with about 2500 species in >80 genera mainly distributed in the Northern Hemisphere of the Old

World. It is traditionally classified into four sub-tribes (Echinopsidinae, Carlininae, Carduinae and Centaureinae; Bremer, 1994). There is considerable controversy regarding the tribal delimitation of Cardueae, especially relating to the segregation of sub-tribes Echinopsidinae and Carlininae as separate tribes (e.g. Wagenitz, 1976; Dittrich, 1977; Bremer, 1994). However, molecular evidence supports the maintenance of Cardueae in its broad sense, and has also revealed parphyly of sub-tribe Carduinae (Susanna *et al.*, 1995, 2006; Häffner and Hellwig, 1999; García-Jacas *et al.*, 2002). Carduinae is the largest sub-tribe of Cardueae, comprising nearly 40 genera and about 1600 species (Bremer, 1994). Within this sub-tribe, some genera show extensive diversification and are species rich, for example *Cousinia* (approx. 600 species) and *Saussurea* (approx. 400 species). However, there are far fewer species in genera *Dolomiaea*, *Diplazoptilon* and *Xanthopappus*, and all these three genera are endemic to the Himalayan region (Fig. 1; Ling, 1965; Lipschitz, 1979; Chen, 1987; Shi, 1987, 1994; Ying and Zhang, 1994; Liu, 1996).

\*For correspondence. E-mail liujq@nwipb.ac.cn or ljqdx@public.xn.qh.cn

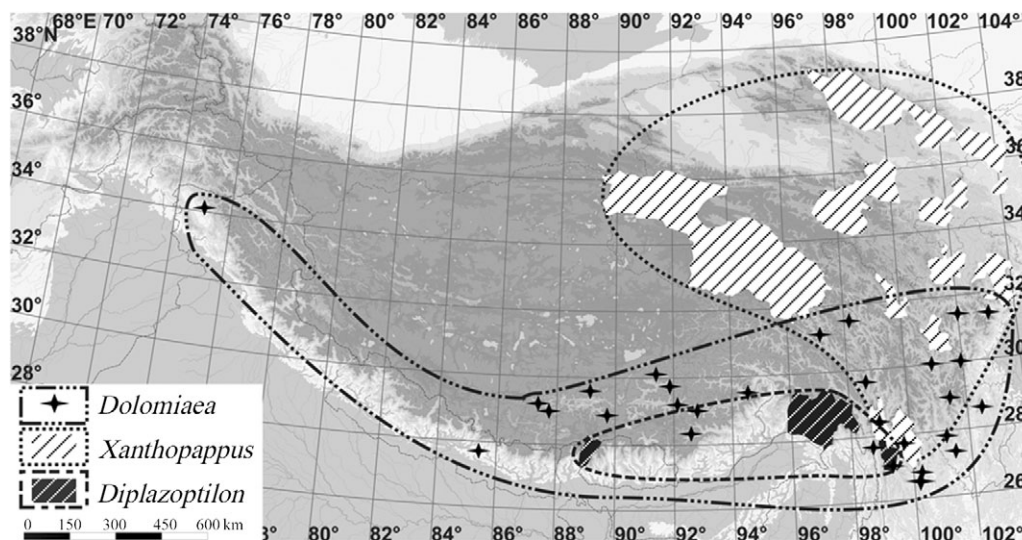

FIG. 1. Distributions of *Dolomiaea*, *Diplazoptilon* and *Xanthopappus* in the Himalayan–Tibetan region. The distributions are outlined according to specimen collections in the field and in herbaria.

*Dolomiaea*, a small genus with approx. 14 species, is restricted to alpine habitats between 2900 and 4800 m of the QTP (Ling, 1965; Shi, 1987, 1994). It has been suggested that it could be related to *Carduus*, *Jurinea* or *Saussurea s.l.*, and it is distinguished from these related genera by the presence of scabrid pappus bristles and alveolate receptacles without scales (Ling, 1965; Shi, 1986). Two sections were suggested within the genus based on their style differences (long and acute vs. short and round) (Shi, 1986), and these two sections were previously treated as two distinct genera by Ling (1965), *Dolomiaea* and *Vladimiria*. *Diplazoptilon* contains only two species, *D. picridifolium* and *D. cooperi*, and is distributed in NW Yunnan and SE Tibet on the QTP at an elevation of 3600–4100 m. This genus has double rows of plump pappus bristles as a diagnostic feature, and was suggested to be related to *Dolomiaea* or *Saussurea* (Ling, 1965; Shi and Jin, 1983; Shi, 1986, 1987). *Xanthopappus* is a monotypic genus which is commonly found on the dry slopes and degraded alpine meadows of the QTP between 2400 and 4000 m. This genus was always considered to have a close relationship to *Carduus* (Dittrich, 1977; Shi, 1986, 1987; Bremer, 1994; Wu *et al.*, 2003). *Xanthopappus* differs from *Carduus* in having yellow florets and smooth filaments, but Smith (1917) considered that these differences were insufficient to establish a separate genus, and he suggested reducing this monotypic genus into *Carduus*. However, this proposal was not adopted by later researchers (e.g. Dittrich, 1977; Shi, 1987; Bremer, 1994).

Within a paraphyletic Carduinae, molecular data have revealed four distinct groups represented by *Saussurea*, *Carduus*, *Onopordum* and *Xeranthemum*, together with some genera without known affinities such as *Berardia* or *Stachelina* (Susanna *et al.*, 1995, 2006; Häffner and Hellwig, 1999; García-Jacas *et al.*, 2002). Although the Himalayan endemic *Dolomiaea*, *Diplazoptilon* and *Xanthopappus* were all ascribed to the traditional sub-tribe

Carduinae, their hypothesized close relatives were evidently placed in the different clades identified by these molecular analyses. In addition, within the *Saussurea* group, intergeneric relationships remain unresolved. A recent investigation of the species-rich *Saussurea s.l.*, which has abundant endemics in the QTP, revealed that this genus is heterogeneous, and three genera were separated: *Himalaiella*, *Frolovia* and *Lipschitzziella* (Raab-Straube, 2003). Both *Himalaiella* and *Lipschitzziella* are endemic to the Himalayan region, and *Frolovia* occurs in the adjacent highlands. Their phylogenetic and taxonomic relationships to other endemic genera from the Himalayan region, especially *Diplazoptilon* and *Dolomiaea*, remain unclear, although Susanna *et al.* (2006) proposed that *Himalaiella*, *Lipschitzziella* and *Frolovia* should be reduced to synonymy with *Jurinea* and *Dolomiaea*, respectively. Apart from these taxa, section *Jacea* of sub-genus *Saussurea* and section *Aucklandia* of sub-genus *Frolovia* should also be excluded from *Saussurea* (Y.-J. Wang *et al.*, unpubl. res.). The remaining species from other sections and sub-genera of the *Saussurea s.l.*, designated as *Saussurea sensu stricto* (*s.s.*), comprise a well-supported clade, despite poor resolution within it (Raab-Straube, 2003; Wang and Liu, 2004a, b; Wang *et al.*, 2005b; Y.-J. Wang *et al.*, unpubl. res.), and is possibly sister to *Hemistepta* or *Polytaxis* (Kita *et al.*, 2004; Susanna *et al.*, 2006).

DNA data, particularly DNA sequences, have greatly contributed to the understanding of the phylogenetics, evolution and taxonomy of Asteraceae (e.g. Jansen and Kim, 1996; Bayer and Starr, 1998; Goertzen *et al.*, 2003). This is particularly true for elucidating generic delimitation and phylogenetic relationships of the problematic genera in Cardueae, for which morphological data are lacking or ambiguous (Susanna *et al.*, 1995, 1999, 2006; Häffner and Hellwig, 1999; García-Jacas *et al.*, 2001, 2002; Raab-Straube, 2003; Hellwig, 2004; Kita *et al.*, 2004; Wang and Liu, 2004a, b; Martins and Hellwig,

2005a, b; Wang *et al.*, 2005b; Hidalgo *et al.*, 2006). Molecular reconstructions of evolutionary relationships between living organisms are increasingly used to infer the putative causes of diversification processes, and origin of endemics within historic and geographic contexts (e.g. Kelch and Baldwin, 2003; Pennington *et al.*, 2004a, b). Based on the new plastid and nuclear DNA sequence data for representative species of the Himalayan endemic genera *Dolomiaea*, *Diplazoptilon* and *Xanthopappus* and related genera of Cardueae, the main objectives of this study were to: (a) evaluate the systematic positions of these three genera; (b) estimate possible time scales for the origin of these endemic genera within the same phylogenetic frame; and (c) infer possible corresponding geological correlations with uplifts of the QTP, which are also useful for seeking general rules that can account for origins of the alpine flora with aberrant morphology occurring there.

## MATERIALS AND METHODS

### *Sampling strategy, plant materials and data sets*

According to Susanna *et al.* (2006), *Diplazoptilon*, *Himalaiella* and *Lipschitziella* should be reduced into *Jurinea* and *Frolovia* into *Dolomiaea*. In addition, they further suggested that the monotypic *Hemistepta* should be incorporated into *Saussurea*. However, they were tentatively treated as distinct genera following the available taxonomic treatments for two reasons. First, the sampled species are limited and an extensive investigation of more species is needed. Secondly, their taxonomic relationships are complex and the final taxonomic treatments have to depend on more morphological evidence in addition to molecular support. Up to now, morphological investigations are lacking, and how broadly to circumscribe these genera still remains elusive.

*Dolomiaea* in its current circumscription contains about 15 species, of which 14 species were previously recorded (Ling, 1965; Shi, 1987, 1994) and one was newly found during the present field studies (unpublished new species). Because two infrageneric sections (*Dolomiaea* and *Vladimiria*) had been treated as two separate genera (Ling, 1965), the sampling strategy was also designed to test whether they should still be segregated. Section *Dolomiaea* comprises three species: *D. calophylla*, *D. wardii* and one new unpublished species '*D. tibetica*', and section *Vladimiria* contains the remaining 11 species. *Dolomiaea calophylla* and '*D. tibetica*' were chosen to represent section *Dolomiaea*, and three species (*D. scabrida*, *D. souliei* and *D. edulis*) to represent section *Vladimiria*. *Diplazoptilon* comprises two closely related species, and of these only *D. cooperi* was sampled. The monotypic genus *Xanthopappus* was collected from two localities, and its hypothesized related genera were mainly chosen according to their distribution range and possible systematic positions within the whole of Cardueae, based on morphology and recent molecular phylogenetic analyses (Shi, 1987; Bremer, 1994; Susanna *et al.*, 1995, 2006; Häffner and Hellwig, 1999; Häffner, 2000;

García-Jacas *et al.*, 2002; Raab-Straube, 2003; Kita *et al.*, 2004; Wang and Liu, 2004a, b; Wang *et al.*, 2005b). The analysis of these genera covered the major clades identified in the recent molecular analyses of this tribe, and all genera of Cardueae occurring in the QTP were sampled. For those genera with abundant species (e.g. *Cousinia*, *Jurinea* and *Onopordum*), only one species was chosen as a representative of each genus. *Saussurea* has been the subject of extensive sampling for molecular analyses (Raab-Straube, 2003; Kita *et al.*, 2004; Wang and Liu, 2004a, b; Wang *et al.*, 2005b), and the type species *S. alpina* was therefore well suited to represent the monophyletic assemblage of *Saussurea s.s.* However, *S. costus*, a species in section *Aucklandia* of sub-genus *Frolovia* and *S. forestii* in section *Jacea* of sub-genus *Saussurea* were also sampled because unpublished data revealed that these species should be excluded from *Saussurea*. The other genera involved in the present analyses might not be monophyletic, but this should not affect the assessment of relationships and origins of three endemic genera because they are mainly distributed in Central Asia or Europe, far away from the QTP. Most genera of Cardopatiinae, Carlininae, Centaureinae and Echinopsidinae were found to comprise corresponding monophyletic lineages, except for a few aberrant genera with unresolved positions (Häffner and Hellwig, 1999; Häffner, 2000; García-Jacas *et al.*, 2002; Susanna *et al.*, 2006), and therefore only one genus was chosen to represent each lineage.

Among 22 newly sampled taxa, from 16 genera, leaves were collected from herbaria specimens for nine taxa, and leaves of the remaining species were directly collected in the field and dried with silica gel. Their origins are listed in Table 1, and the voucher specimens are deposited in the Northwest Plateau Institute of Biology, Chinese Academy of Sciences. Data sets are based on the sequences of the nuclear ribosomal internal transcribed spacer (ITS), plastid *trnL* intron and *trnL-F* intergenic spacer (*trnL-F*), and plastid *psbA-trnH* intergenic spacer (*psbA-trnH*) regions. Newly available sequences, accession numbers and the origin of materials are also given in Table 1. The other sequences for analyses were downloaded from GenBank, and their origins are referred to in Susanna *et al.* (1995, 2006), Häffner and Hellwig (1999), O'Hanlon and Peakall (2000), García-Jacas *et al.* (2002), Kelch and Baldwin (2003) and Kita *et al.* (2004). Because of the poor DNA extracted from the specimens and unavailable DNA for those species for which the sequences were downloaded from GenBank, all three fragments were not obtained for all species.

Three data sets were used for phylogenetic analyses. The first is composed of 49 nuclear ITS sequences from 41 genera of Cardueae and *Brachylaena* (outgroup) of Tarchonantheae (the closely related tribe; Panero and Funk, 2002). This data set was designed to detect the systematic positions of all three genera in Cardueae. The sequences covered both ITS1 and ITS2, but excluded the 5.8S gene because of the absence of any mutations in this fragment in the newly sampled species, and no corresponding record of this fragment for those species downloaded from GenBank. The construction of the second

TABLE 1. List of taxa and sources of plant material analysed for the first time in the present study and the sequence accession numbers in GenBank

| Species                                            | Origins                                              | ITS      | <i>trnL-F</i> | <i>psbA-trnH</i> |
|----------------------------------------------------|------------------------------------------------------|----------|---------------|------------------|
| <i>Ancathia igniaria</i> (Spreng.) DC.             | Xinjiang, Altai, China; Zhu6945                      | AY914811 | —             | —                |
| <i>Arctium lappa</i> L.                            | Jiuzhi, Qinghai, China; Liu1834                      | AY914812 | AY914854      | AY914834         |
| <i>Carduus crispus</i> L.                          | Tongren, Qinghai, China; Liu079                      | AY914813 | AY914855      | AY914835         |
| <i>Cirsium lidjiangense</i> Petrak ex Hand.-Mazz.  | Muli, Sichuan, China; Liu2137                        | AY914828 | AY914856      | AY914836         |
| <i>Diplazoptilon cooperi</i> (Anthi.) Shih         | Yadong, Xizang, China; 74–2338                       | AY914814 | AY914857      | AY914837         |
| <i>Dolomiaea calophylla</i> Ling                   | Lasa, Xizang, China; Liu2565                         | AY914816 | AY914859      | AY914839         |
| <i>Dolomiaea edulis</i> (Franch.) Shih             | Hongyuan, Sichuan, China; Liu2191                    | AY914817 | AY914860      | AY914840         |
| <i>Dolomiaea scabrida</i> (Shih et S. Y. Jin) Shih | Xizang, China; X102                                  | AY914818 | —             | —                |
| <i>Dolomiaea souliei</i> (Franch.) Shih            | Lixian, Sichuan, China; Liu1942                      | AY914815 | AY914858      | AY914838         |
| <i>Dolomiaea tibetica</i> S. W. Liu et J. Q. Liu   | Sangri, Xizang, China; Liu1137                       | AY914819 | —             | —                |
| <i>Echinops przewalskii</i> Iljin                  | Kunming, Yunnan, China; Liu2161                      | AY914820 | AY914861      | AY914841         |
| <i>Frolovia frolovii</i> (Ledeb.) Raab-Straube     | Altai, Xinjiang, China; A1194                        | AY914822 | AY914862      | AY914842         |
| <i>Hemistepta lyrata</i> (Bunge) Bunge             | Beijing, China; Wang040601                           | AY914824 | AY914864      | AY914844         |
| <i>Himalaiella deltoidea</i> (DC.) Raab-Straube    | Gonggashan, Sichuan, China; Liu2072                  | AY914825 | AY914865      | AY914845         |
| <i>Jurinea multiflora</i> (L.) B. Fedtch.          | Tacheng, Xinjiang, China; Guan4505                   | AY914826 | —             | AY914846         |
| <i>Onopordum acanthium</i> L.                      | Urumchi, Xinjiang, China; 79–149                     | AY914827 | AY914866      | AY914847         |
| <i>Saussurea alpina</i> (L.) DC.                   | Upsaliensis, Suesica; 060802                         | AY914829 | AY914867      | AY914848         |
| <i>Saussurea costus</i> (Falc.) Raab-Straube       | Weixi, Yunnan, China; Wang040602                     | AY914821 | DQ874335      | DQ874336         |
| <i>Saussurea forestii</i> Diels                    | Cuona, Xizang, China; Qinghai-Tibet expedition, 3200 | DQ874337 | DQ874338      | DQ874339         |
| <i>Serratula strangulata</i> Iljin                 | Datong, Qinghai, China; Liu1608                      | AY914830 | AY914868      | AY914850         |
| <i>Silybum marianum</i> (L.) Gaertn.               | Wuding, Yunnan, China; Liu2143                       | AY914831 | AY914869      | AY914849         |
| <i>Xanthopappus subacaulis</i> C. Winkl.           | Henan, Qinghai, China; Liu050 (1)                    | AY914832 | AY914870      | AY914851         |
|                                                    | Qilian, Qinghai, China; Liu1521 (2)                  | AY914833 | AY914871      | AY914852         |

data set was based on the plastid *trnL-F* and *psbA-trnH* sequences from 27 accessions of 22 genera. The third data set was composed of both nuclear and plastid sequences from 27 taxa of 22 genera for which ITS, *trnL-F* and *psbA-trnH* sequences were all available. For the second and third analyses, *Echinops* of the sub-tribe Echinopinae was selected as the outgroup following previous reports (Susanna *et al.*, 2006) and the present ITS analyses.

#### DNA extraction, amplification and sequencing

Total genomic DNA was isolated from samples directly dried in the field using the 2× CTAB (cetyltrimethyl ammonium bromide) method of Doyle and Doyle (1987), and for samples from herbarium specimens with the Plant DNA Isolation Kit (Casarray, Shanghai, China) according to the manufacturer's protocol. The nuclear ITS region and the plastid *trnL-F* and *psbA-trnH* regions were amplified, respectively, with primers ITS1 and ITS4 (White *et al.*, 1990), c and f (Taberlet *et al.*, 1991) and *psbA* and *trnH* (Sang *et al.*, 1997). The 25 µL volume polymerase chain reactions (PCRs) contained 12–60 ng of plant DNA, 50 mM Tris–HCl, 1.5 mM MgCl<sub>2</sub>, 0.5 mM dNTPs, 2 µM of each primer and 0.75 U of *Taq* polymerase (Casarray, Shanghai, China). The PCR amplification profiles were identical for the three fragments: one cycle at 94 °C for 4 min; 32 cycles at 94 °C for 1 min, 50 °C for 1 min, 72 °C for 1.5 min; and one cycle at 72 °C for 7 min. PCR products were purified using a CASpure PCR Purification Kit following the protocol recommended by the manufacturer (Casarray, Shanghai, China). Sequencing primers were the same as those used for amplifying the corresponding regions. Sequencing reactions were carried out in a Biometra thermocycler using the DYEnamic ET

terminator Cycle Sequencing Kit (Amersham Biosciences), following the manufacturer's protocol. Sequencing products were separated and analysed on a MegaBACE 500 DNA Analysis System. Both DNA stands were sequenced using forward and reverse primers, giving an overlap of at least 70 %.

#### Sequence alignment, boundary determination and data analysis

Alignment of all sequences was conducted using ClustalX (Thompson *et al.*, 1997) and refined manually. Sequence boundaries were determined by comparison with published sequences of other genera of Asteraceae downloaded from GenBank. Pairwise distances, corrected with the Kimura 2-parameter (K2P) model (Kimura, 1980), were calculated with MEGA version 3.1 (Kumar *et al.*, 2004).

Each data set was subjected to maximum parsimony (MP) and maximum likelihood (ML) using PAUP\* 4.0b10 (Swofford, 2003) and Bayesian analyses using MrBayes 3.0 (Huelsenbeck and Ronquist, 2001). Modeltest (Posada and Crandall, 1998) was used to select parameters and assumptions for ML analyses. ML heuristic search parameters were simple addition of sequences of taxa with TBR branch swapping, MULTREES and COLLAPSE. MP analyses (equally weighted characters and nucleotide transformations) involved a heuristic search strategy with 100 replicates of random addition of sequences, in combination with ACCTRAN character optimization, MULPARS + TBR branch swapping and STEEPEST DESCENT options on. Gaps were treated as missing characters. The bootstrap values (BP) were calculated from 1000 replicates using a heuristic search with simple addition with TBR and MULPARS options on (Felsenstein, 1985). For Bayesian

analyses, four simultaneous Monte Carlo Markov chains (MCMCs) were run for 2 000 000 generations saving a tree every 100 generations. Because the fittest models selected for the analysed data sets were not implemented in MrBayes, a common model GTR + I + G was used for the different data sets in the Bayesian analyses. Base frequencies were empirically derived. A majority rule consensus tree was calculated with PAUP\* from the last 16 001 out of the 20 001 trees sampled. The first 4000 trees (burn-in) were excluded to avoid trees that might have been sampled prior to convergence of the Markov chains. Posterior probability (shown as percentages, PP) of each topological bipartition was estimated by its frequency across all the 16 001 trees sampled. Congruence between different DNA data sets was evaluated by the incongruence-length-difference (ILD) test with 1000 replicates on parsimony-informative characters using the TBR branch swapping algorithm, with the number of trees retained for each replicate limited to 1000 (Farris *et al.*, 1995).

#### *Molecular calibration*

Because the putative pseudogenes of ITS usually originate more recently than the functional copies (Bailey *et al.*, 2003), their existence in the aligned data set could confound phylogenetic reconstruction and affect the dating of the divergence among the orthologous sequences (Alvarez and Wendel, 2003). The strategies here included direct sequencing of PCR products in both forward and reverse orientations, and using only those sequences that were unambiguously resolved. In addition, sequences from multiple accessions of individual species were obtained whenever possible. It was also checked whether the newly available sequences are functional sequences or putative pseudogenes by examining nucleotide substitutions in a highly conserved region (5.8S gene), a relatively reliable indicator for discerning ITS orthologues (Hershkovitz *et al.*, 1999). In addition, there was no suggestion in previously published and unpublished studies that indicated that the taxa targeted in this study have confounding paralogous sequences from the ITS region.

The hypothesis of rate constancy was evaluated with the likelihood ratio test (LRT) that is twice the difference in log likelihood (likelihoods) of branch lengths between a rate-constrained tree (forcing the molecular clock in PAUP\*) and a tree that has no constraints on branch lengths (Goldmann, 1993). The molecular clock was rejected because constrained and unconstrained analyses differed significantly, so semi-parametric rate smoothing with a penalized likelihood (PL) approach, based on the ML tree without a molecular clock enforced, was used to produce an ultrametric tree with the aid of the computer program r8s (Sanderson, 2002). Penalized likelihood combines the likelihood term for a saturated model with a different rate on every branch and the non-parametric penalty function that keeps those rate estimates from varying excessively across the tree. The relative contribution of the two terms is controlled by a smoothing parameter which was determined based on a data-driven cross-validation procedure implemented in r8s (Sanderson,

2002). To obtain standard deviations for estimated divergence times, the data set was bootstrapped 100 times using the SEQBOOT module from PHYLIP (Felsenstein, 1989), and branch lengths were re-estimated for each node under the constrained initial topology in PAUP\*. The dating analyses were then repeated for each tree, and node statistics were summarized using the PROFILE command of program r8s.

## RESULTS

#### *The analyses of the nuclear ITS data set*

All the newly available sequences covered the 5.8S gene (164 bp), but no mutations were found within this segment. It was therefore assumed that all of these ITS sequences are functional orthologues rather than paralogues. Due to the unavailability of this fragment in the previously published species, it was omitted from any further analyses. The aligned ITS matrix is 498 bp long, 88 bp of which were variable but phylogenetically uninformative, and 271 bp that were variable and potentially phylogenetically informative when gaps were treated as missing characters. Parsimony analysis identified 142 trees with a length of 1512 steps, a consistency index (CI) of 0.388 and a retention index (RI) of 0.540. The consensus MP tree was mostly congruent with the ML tree ( $-\ln L = 7324.43926$ , the best-fit model GTR + I + G) in topology and the 50 % majority rule consensus tree derived from Bayesian analysis (Fig. 2). Of the excluded gaps, one indel of 6 bp is shared by all members of the *Saussurea* group. Two indels of 2 and 1 bp, respectively, support the clustering of *Diplazoptilon* and *Himalaiella*.

Four major groups were recovered within Carduinae, here referred to as the *Carduus*, *Saussurea*, *Onopordum* and *Xeranthemum* groups, respectively. Two clades containing *Diplazoptilon* and *Dolomiaea* were closely related to each other within the *Saussurea* group. *Diplazoptilon* is sister to *Himalaiella* (BP = 90 %; PP = 100 %), a newly resurrected genus from *Saussurea s.l.*, and together they are sister to another newly recognized genus from *Saussurea s.l.*, *Lipschitzella* (BP = 99 %; PP = 100 %). The group comprising these three genera is sister to *Jurinea* (BP = 100 %; PP = 100 %). *Frolovia frolovii* and *Saussurea costus* were nested in a clade with five species of *Dolomiaea* (BP = 86 %; PP = 98 %), and this clade was resolved as sister to the lineage containing *Diplazoptilon* and three other genera. *Xanthopappus* fell in the *Onopordum* group (BP = 83 %; PP = 100 %).

Among the 41 genera examined within Cardueae, the average pairwise nucleotide distance was 17.85 %, with the smallest distance (0.8 %) occurring between *Hypacanthium* and *Schmalhausenia* and the largest (32.9 %) between *Chardinia* and *Lamyropsis*. Pairwise distances between *Dolomiaea* and its previously assumed closely related genera were 20.2–22 % (*Carduus*), 14.6–17.3 % (*Jurinea*) and 9.1–12.8 % (*Saussurea s.s.*). Within the *Dolomiaea–Frolovia* clade, the smallest distance (3.4 %) was detected between *D. edulis* and *Saussurea*

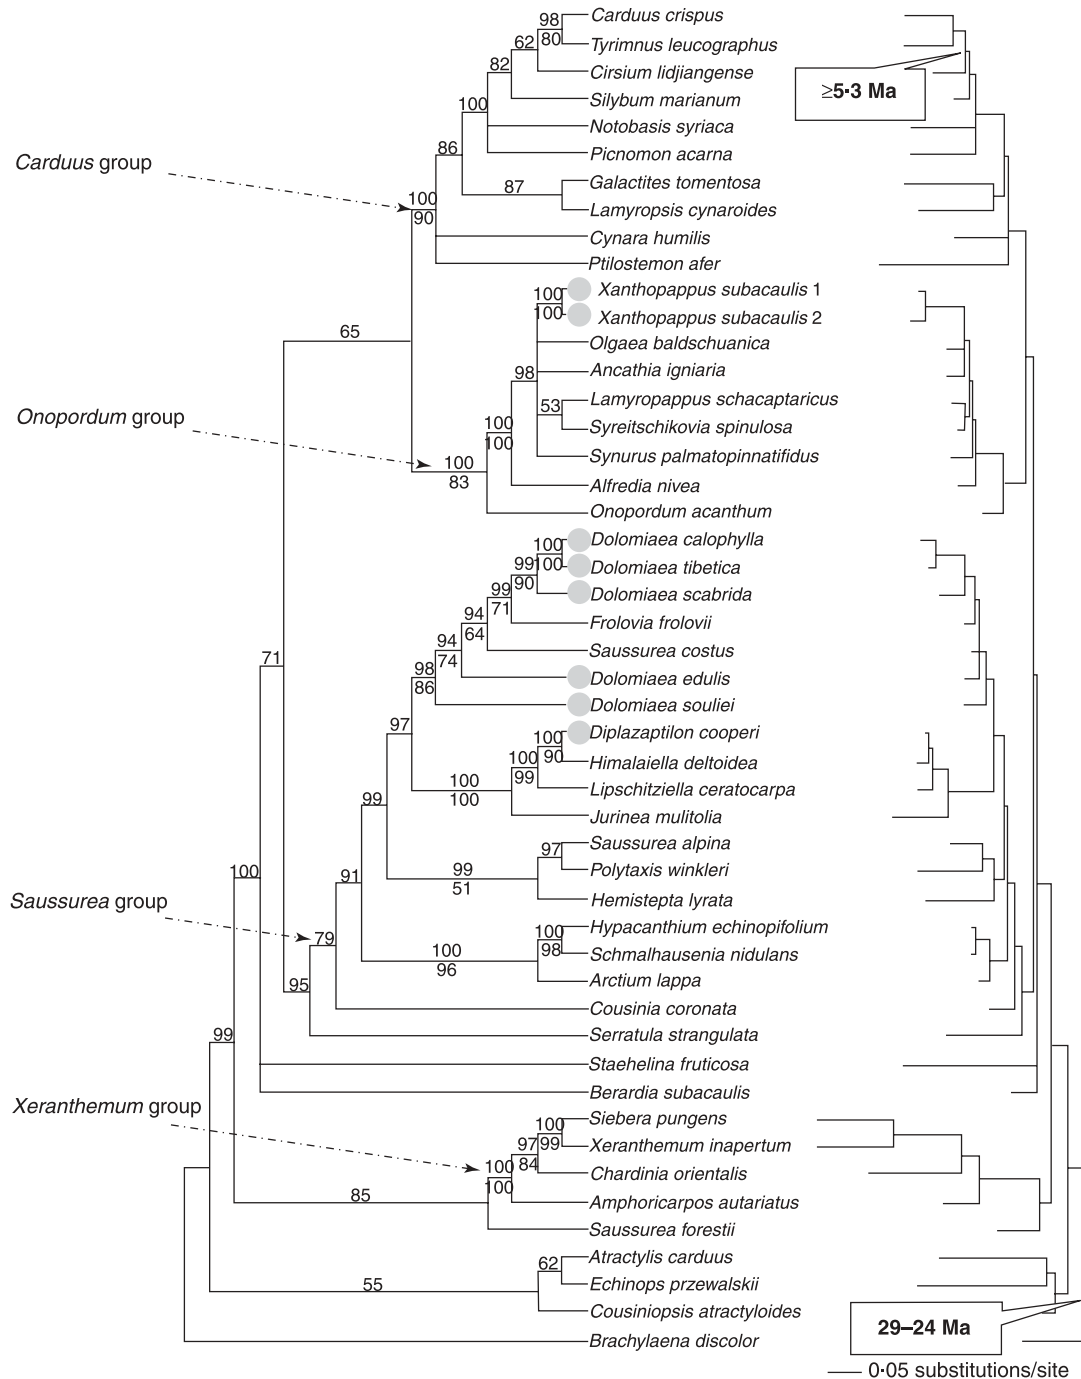

FIG. 2. The 50% majority rule consensus tree derived from Bayesian analysis of the ITS data set (left) and the maximum likelihood (ML) tree (right) constructed from the ITS data set with gaps excluded. Posterior probabilities are noted above branches, and bootstrap support values (>50%) are given below branches. The circles mark the endemic genera on the Himalayan highlands. The shaded times indicate the calibrations used for the molecular dating.

*costus*. *Diplazoptilon* showed a pairwise distance variation of 1.8% with *Himalaiella*. However, pairwise distances between *Diplazoptilon* and two genera previously assumed to be close relations were 13.9% (*Saussurea* s.s.) and 11.4% (*Dolomiaea*). *Xanthopappus* showed a pairwise distance variation of 7.1–7.3% with *Ancathia*, but 19.9–21.2% with *Carduus*.

#### Combined analyses of plastid *trnL-F* and *psbA-trnH* regions

Both the *trnL-F* and *psbA-trnH* regions showed low variation, and partition homogeneity analyses gave no significant incongruence between them ( $P = 0.9$ ). These two fragments were therefore combined together for phylogenetic analyses. The combined data set was composed

of 27 accessions from 22 genera of Cardueae (20 genera from Carduinae, and one genus, respectively, from Centaureinae and Echinopsidinae). The aligned matrix consisted of 1350 positions, including 85 parsimony-uninformative variable sites and 39 potentially parsimony-informative variable sites. The MP analyses recovered 980 trees (length = 155 steps; CI = 0.832; RI = 0.745). The strict consensus of these MP trees (not shown) is similar to the Bayesian majority consensus tree and the ML tree (Fig. 3).

The groupings of *Dolomiaea* and *Frolovia*, *Diplazoptilon* and *Himalaiella*, and *Xanthopappus* and *Onopordum* were again found. However, the relationships of these lineages and other clades and genera were less well resolved (Fig. 3). The pairwise distance between *Dolomiaea* and *Frolovia* is 0.26–0.6%; in contrast, *Dolomiaea* showed a pairwise distance variation of 0.52–0.87% with *Carduus*, 0.96–1.3% with *Jurinaea* and 0.69–1.0% with *Saussurea s.s.* *Diplazoptilon* showed the smallest distance, 0.52%, with *Himalaiella*, and the

distances between it and its previously assumed closely related genera are 0.69–1.0% (*Dolomiaea*) and 1.21% (*Saussurea s.s.*). The pairwise distance between *Xanthopappus* and *Onopordum* was 1.0–1.3%, and the distance between it and *Carduus* was 1.5–1.7%.

#### Combined analyses of nuclear ITS and plastid *trnL-F* and *psbA-trnH* fragments

The ILD test ( $P = 1.0$ ) showed that the two data sets, the nuclear rDNA ITS vs. the combination of the plastid *trnL-F* and *psbA-trnH*, were fully congruent, and it is therefore justifiable to combine them in a single data set for further analysis. The combined sequence matrix comprised 1848 characters after alignment, of which 189 sites were variable but uninformative, and 226 sites were variable and potentially parsimony-informative when gaps were treated as missing characters. The heuristic search resulted in 78 trees (length = 1002 steps; CI = 0.555; RI = 0.553). Their strict consensus produced an identical

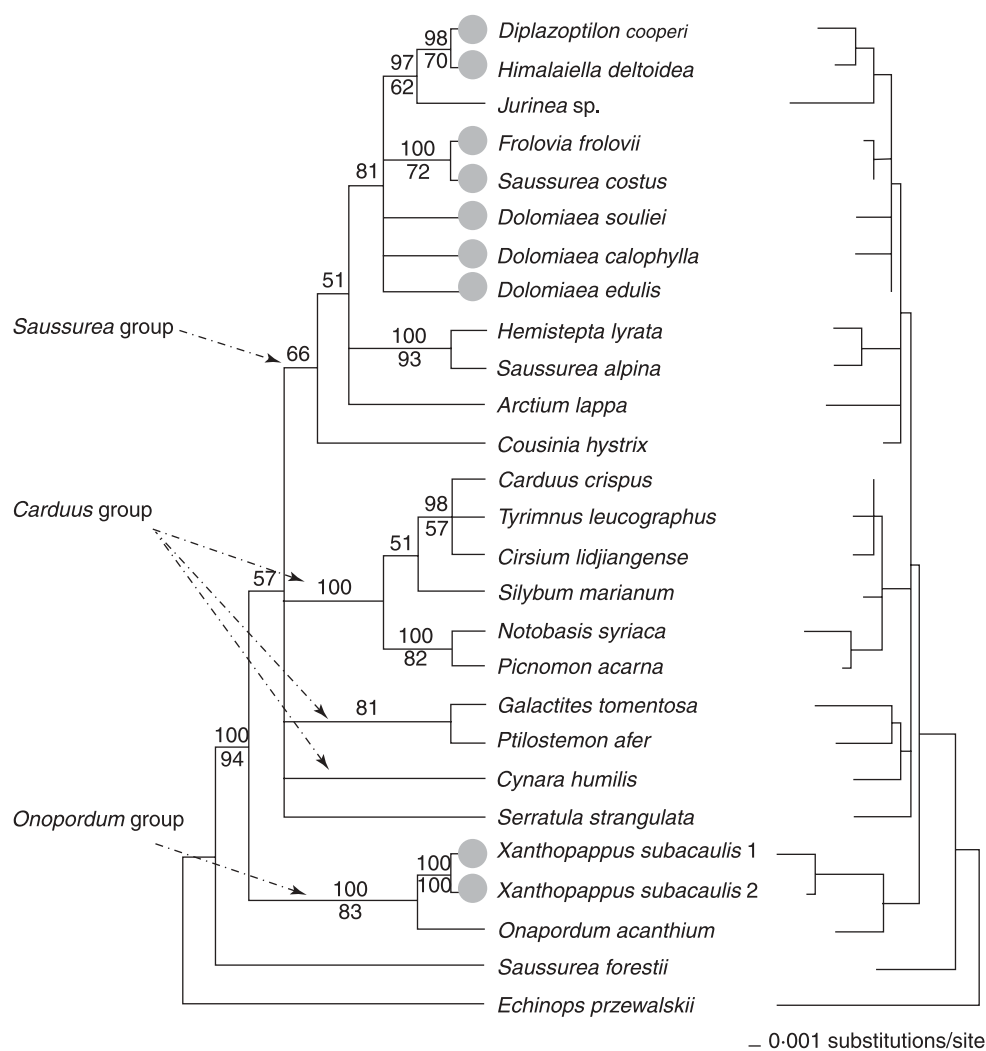

FIG. 3. The 50% majority rule consensus tree derived from Bayesian analysis of two the combined plastid data sets (left) and the ML tree constructed from the same data set (right). Other details are the same as those in Fig. 2.

topology to the majority consensus tree of the Bayesian inferences. The ML tree (TIM + I + G model,  $-\ln L = 8256.4629$ ) also yielded a similar topology. The analyses of the combined data set confirmed all identified clades in both Figs 2 and 3, and most of them received elevated support.

#### *Divergence times*

Because the ITS data matrix includes most representative genera of Cardueae, with a coverage of the wide morphological range of this tribe, only this data set was used to infer origin time scales of the Himalayan genera. LRT strongly rejected the assumption of a molecular clock for the nuclear ITS sequence matrix ( $-\ln L = 7324.43926$  vs.  $7439.92302$ ; d.f. = 47;  $P < 0.001$ ), so the ML phylogram was calculated in the absence of a molecular clock and then it was subjected to rate smoothing applying PL implemented in the software r8s (Sanderson, 2002).

Fossil records for Cardueae are rare, and the earliest of the known records is pollen of *Cirsium* from the early Pliocene (Menke, 1976; Graham, 1996). It was hypothesized that the divergence of *Cirsium* and its sister *Carduus* occurred before the early Pliocene, and constrained 5.3 Ma as a minimum age to the stem node of *Cirsium*. At the same time, the stem age of Cardueae was estimated as 29–24 Ma in a recent dating of Asteraceae (Kim *et al.*, 2005) and therefore this dating was used to calibrate the divergence of Cardueae from Tarchonantheae (Fig. 2). The DIVTIME command of the r8s program with the cross-validation function enforced identified the smoothing parameter value of 1.6 as the optimal and it was then selected to execute the PL estimates. The results indicated that the divergences of *Dolomiaea*, *Diplazoptilon* and *Xanthopappus* from their sisters probably occurred between 13.6 and 12.2 Ma, 2.0 and 1.6 Ma or 5.7 and 4.7 Ma, respectively.

## DISCUSSION

#### *Systematic position of Xanthopappus*

The close relationship between *Xanthopappus* and *Carduus* has never previously been questioned because of their close similarity in spiny morphology and their sympatric distributions (Smith, 1917; Kazmi, 1963, 1964; Dittrich, 1977; Shi, 1987; Bremer, 1994; Wu *et al.*, 2003). These two genera commonly share hairy receptacles, entire pericarpal crowns, straight carpopodia and multiserial, scabrid, basally connate pappus bristles. *Xanthopappus* differs from *Carduus* in having yellow florets and smooth filaments (Smith, 1917; Shi, 1987). However, the molecular data indicated that *Xanthopappus* nested within the *Onopordum* group together with *Alfredia*, *Ancathia*, *Lamyropappus*, *Olgaea*, *Synurus* and *Syreitschikovia* whereas *Carduus* fell in a separate *Carduus* group with *Cirsium* and eight other genera.

The exclusion of *Xanthopappus* from the *Carduus* group further supports natural circumscription of this group, as suggested by Häffner and Hellwig (1999),

García-Jacas *et al.* (2002) and Susanna *et al.* (2006). This ‘thistle’ group was considered to share common rose-coloured flowers, but the flowers of the *Onopordum* group are similarly pink or purple (Shi, 1987). However, floral colour appears to have developed as a result of parallel evolution within Cardueae. All genera in this group have hairy or papillate anther filaments. In addition, their habit, habitat and distribution are similar, according to Häffner (2000). In contrast, members of the *Onopordum* group, including *Xanthopappus*, are characterized by glabrous filaments and yellow and highly fragile pappus bristles (Shi, 1987; Bremer, 1994; Petit *et al.*, 1996; Petit, 1997; Häffner, 2000). *Xanthopappus* is endemic to the QTP, and the remaining genera in this group are centred in central Asia (Shi, 1987; Bremer, 1994; Häffner, 2000).

#### *The generic delimitation and the phylogenetic relationships of Dolomiaea and Diplazoptilon*

The nuclear ITS analyses indicate that all sampled species of *Dolomiaea* and *Frolovia frolovii* and *Saussurea costus* form a well supported clade (Fig. 2). The genetic distances, 2.8–8.9% for the ITS data within the *Dolomiaea*–*Frolovia* clade fall well within the infrageneric variation reported for Asteraceae (Fernández *et al.*, 2001). The combined plastid analyses also revealed a close relationship between these species (Fig. 3). Therefore, *Frolovia* and *S. costus* should be placed in the broadly recircumscribed *Dolomiaea*. Raab-Straube (2003) resurrected *Frolovia* from *Saussurea* sub-genus *Frolovia*, and pointed out its close relationship with *Jurinea*. However, he did not include *S. costus* within *Frolovia*, which was formerly placed in *Saussurea* subgen. *Frolovia*, although the major reason for its exclusion from *Frolovia* might be that it differs from the other species in this genus in having entire leaves. The present results suggest that *S. costus* is more closely related to *Frolovia* and *Dolomiaea* than to species of *Saussurea s.s.*, and that it should similarly be placed in the expanded *Dolomiaea*. These findings are basically consistent with the recent investigation conducted by Susanna *et al.* (2006). Possible morphological evidence for this lineage is that all the species have apical pericarp rim projections. The chromosome number, pollen type and cypsela anatomy remain unknown for all species of *Dolomiaea* and *Frolovia* and *S. costus* examined here.

Ling (1965) treated *Vladimiria* as a separate genus and established two sections, section *Vladimiria* and section *Sorocephalos*, according to the number of capitula on the inflorescence. Shi (1986), however, did not adopt such a classification and recognized only section *Vladimiria* and section *Dolomiaea* when he merged these two genera. The differences proposed for these two sections are the same as those for generic delimitation listed by Ling (1965): long and acute vs. short and round styles. Both *D. calophylla* and *D. tibetica* with short and round styles in section *Dolomiaea* form a clade, nested within the other species, but the three species *D. souliei*, *D. edulis* and *D. scabrida*, with long and acute styles, do not comprise a corresponding clade (Fig. 2). Similarly, the topology



(Fig. 2) indicates that two species, *D. souliei* and *D. scabrída*, with more than one capitulum on the inflorescence do not form a clade. These results support a combination of two genera as a single genus, and further suggest that the infrageneric classification of the broadly circumscribed genus needs further revision. The long and acute styles and the inflorescence with more than one capitulum are likely to represent plesiomorphic states within *Dolomiaea* as assessed from the molecular trees. The inclusion of *Frolovia* and *S. costus* within the broadly circumscribed *Dolomiaea* makes the morphological variation in this genus more complex. Further examinations of morphological variation in *Dolomiaea* and the correlation of this with molecular data are needed before a final infrageneric system can be established and taxonomic treatments can be made.

According to both individual and combined ITS and plastid analyses, *Diplazoptilon* is sister to the newly established genus *Himalaiella*. These results reject the relationships of *Diplazoptilon* with *Saussurea*, *Dolomiaea* or *Jurinea*, as suggested by various authors (e.g. Ling, 1965; Shi, 1986). *Diplazoptilon* and *Saussurea* are similar in having two rows of pappus bristles (Ling, 1965), but *Diplazoptilon* differs from *Saussurea* s.s. (as defined by Raab-Straube, 2003) by its pericarp crown and alveolate receptacles. These two traits are also found in *Dolomiaea* as broadly defined here, but the anther bases of *Diplazoptilon* are hairy, unlike those of *Dolomiaea*. A combination of granulate and echinate pollen in *Diplazoptilon* is distinctly different from the echinate pollen form of *Jurinea*. *Diplazoptilon* differs from *Himalaiella* by the double layer of plump pappus bristles (Shi, 1987; Raab-Straube, 2003). Susanna *et al.* (2006) suggested that *Diplazoptilon*, *Himalaiella*, *Lipschitziella* and *Jurinea* should be taxonomically treated together as a single genus. However, up to now, due to the lack of morphological investigation, it is still difficult to find distinct characters to unite this lineage as a broadly circumscribed genus.

#### *Origins of the Himalayan endemic genera and alpine flora*

Within the *Saussurea* group, the crude dating based on ITS sequence divergence revealed that *Dolomiaea*, including *F. frolovii* and *S. costus*, diverged from its sister clade probably around 13.6–12.2 Ma. The divergence times of *Diplazoptilon* from *Himalaiella* were calculated to be around 2.0–1.6 Ma. *Xanthopappus* probably diverged from its close relatives some 5.7–4.7 Ma. These crude estimates indicate that the origins of the three sampled genera distributed in the high elevations of the Himalayan region occurred during different periods, probably from 13.6 to 1.6 Ma, and therefore suggest a continuous origin hypothesis for endemic genera in this area since the middle Miocene. Molecular calibration of branching time in phylogenetic trees is controversial, and should be treated with caution. However, when palaeontological data are lacking, molecular estimates provide the only means of inferring the age of lineages (Li, 1997; Bromham and Penny, 2003). Despite these concerns, we are reasonably

confident that these genera originated through gradual allopatric speciation, for two reasons. First, a discernible clustering of genetic mutations in some endemics within phylogenetic trees was obvious, and these endemic genera were revealed to have different genetic distances with their sister lineages. These findings suggest gradual and continuous origins of these endemics, notwithstanding the unavailability of precise dating. Secondly, geological evidence indicates that recent extensive uplifting of the QTP occurred during at least four different periods since the early Miocene, i.e. 22 Ma, 15–13 Ma, 8–7 Ma and 3.5–1.6 Ma (Harrison *et al.*, 1992; Li *et al.*, 1995; Shi *et al.*, 1998; Spicer *et al.*, 2003). It is feasible, therefore, that these uplifts created continuous fragmentation of habitats, and continuously produced endemic genera through allopatric speciation in the QTP and the adjacent Himalayan region.

The endemic genera occurring in the QTP and the adjacent Himalayan highlands are small, with fewer than 15 species, and many are monotypic (Wu, 1987; Wu *et al.*, 1995). In contrast to morphological distinctness, some of these endemics showed low genetic divergence from their sister groups, e.g. *Diplazoptilon*, or even nest within other genera, e.g. *Frolovia* within *Dolomiaea*, as revealed here. Several recent molecular studies of the QTP endemic genera uncovered similar results, e.g. *Sinadoxa* (Adoxaceae) (Liu *et al.*, 2000), *Milula* (Alliaceae) (Friesen *et al.*, 2000), *Lomatogoniopsis* (Gentianaceae) (Liu *et al.*, 2001) and *Sinacalia* (Asteraceae) (Liu *et al.*, 2006). Undoubtedly these endemics originated *in situ* with the more recent uplifts of the plateau since the Pliocene (within approx. 5 Ma), and with rapid formation of aberrant morphology. However, a few genera could have greater genetic distances and more ancient divergence times with their sister lineages, e.g. broadly defined *Dolomiaea* (approx. 13.55–12.17 Ma) in the present study, *Nannoglottis* of Asteraceae (probably between 22 and 32 Ma; Liu *et al.*, 2002) and *Pomatosace* of Primulaceae (probably around 10 Ma; Wang *et al.*, 2004). Except for the endemic genera with aberrant morphology, another important characteristic of alpine flora in the Himalayan highlands is the high diversification of some lineages, especially some genera with >100 species endemic to the region, e.g. *Gentiana* (Gentianaceae) and *Rhododendron* (Ericaceae) (Wu, 1987; Wu *et al.*, 1995). The species richness in these genera contributes to the majority of the alpine flora in this region (Wu *et al.*, 1995). Molecular analyses of a few such large genera have revealed poorly resolved infrageneric phylogenetic relationships suggesting radiative diversification. Molecular calibrations suggested that the radiation of some genera (e.g. *Pedicularis*, Yang *et al.*, 2003; *Saussurea*, Wang and Liu, 2004a; *Ligularia–Cremanthodium–Parasenecio* complex, Liu *et al.*, 2006) was triggered by the earlier uplifts of the QTP, whereas the onset of diversification of others (e.g. *Gentiana*, Yuan and Kupfer, 1997; *Rheum*, Wang *et al.*, 2005a; *Rhododendron* sub-genus *Hymenanthes*, Milne, 2004 and pers. comm.) seem to have occurred more recently (e.g. radiation of *Rhododendron* sub-genus *Hymenanthes*, approx. 4–6 Ma; Milne, 2004 and pers. comm.).

In conclusion, this research has provided evidence for a continuous development of endemic genera, probably triggered by different uplifts of the QTP between the Miocene (approx. 22 Ma) and the Quaternary (approx. 2 Ma). These continuous uplifts might similarly have contributed to the radiation and diversification of species-rich genera occurring there and in adjacent regions, where the formation of the major habitats and geography can be mainly attributed to the uplift of the QTP. Apart from botanical examples, recent research on animal diversification in the QTP and adjacent Himalayan regions revealed a similar correlation with different uplift stages of the plateau from the Miocene to the Quaternary. Pikas, oriental voles and sand lizards were estimated to have initiated extensive diversification around or within the Pliocene (Yu *et al.*, 2000; Pang *et al.*, 2003; Luo *et al.*, 2004). However, Chinese sisorid catfishes originated in the Oligocene–Miocene boundary (24–19 Ma), and radiated from Miocene to Pleistocene (Guo *et al.*, 2005). Further studies of other organisms are now required to establish if the development of endemic genera and radiation of species-rich lineages triggered by different uplifts of the plateau are a common phenomenon and of major importance in generating the current high diversity of plants and other organisms within this region and adjacent areas.

#### ACKNOWLEDGEMENTS

We are grateful to Dr Mike Fay and two anonymous referees for their constructive comments on an earlier version of this paper. Support for this research was provided by the Key Innovation Plan KSCX2-SW-106, KSCX2-YW-Z, the Special Fund for an Outstanding PhD Dissertation, FANEDD 200327, the Specialized Research Fund for the Doctoral Program of Higher Education and a grant from the German Research Council (Mi 271/15-1).

#### LITERATURE CITED

- Alvarez I, Wendel JF. 2003. Ribosomal ITS sequences and plant phylogenetic inference. *Molecular Phylogenetics and Evolution* **29**: 417–434.
- Bailey CD, Carr TG, Harris SA, Hughes CE. 2003. Characterization of angiosperm nrDNA polymorphism, paralogy, and pseudogenes. *Molecular Phylogenetics and Evolution* **29**: 435–455.
- Bayer RJ, Starr JR. 1998. Tribal phylogeny of the Asteraceae based on two non-coding chloroplast sequences, the *trnL* intron and *trnL/trnF* intergenic spacer. *Annals of the Missouri Botanical Garden* **85**: 242–256.
- Bremer K. 1994. *Asteraceae: cladistics and classification*. Portland, OR: Timber Press.
- Bromham L, Penny D. 2003. The modern molecular clock. *Nature Reviews Genetics* **4**: 216–224.
- Chen YL. 1987. Compositae. In: Wu CY, ed. *Flora Xizangica*, Vol. 4. Beijing: Science Press.
- Dittrich M. 1977. Cynareae – systematic review. In: Heywood VH, Harborne JB, Turner BL, eds. *The biology and chemistry of the Compositae*. London: Academic Press, 999–1015.
- Doyle JJ, Doyle JL. 1987. A rapid DNA isolation procedure for small quantities of fresh leaf material. *Phytochemical Bulletin of the Botanical Society of America* **19**: 11–15.
- Farris JS, Källersjö M, Kluge AG, Bult C. 1995. Constructing a significance test for incongruence. *Systematic Biology* **44**: 570–572.
- Felsenstein J. 1985. Confidence limits on phylogenies: an approach using the bootstrap. *Evolution* **39**: 783–791.
- Felsenstein J. 1989. PHYLIP—phylogeny inference package (version 3.2). *Cladistics* **5**: 164–166.
- Fernández IA, Aguilar JF, Panero JL, Feliner GN. 2001. A phylogenetic analysis of *Doronicum* (Asteraceae, Senecioneae) based on morphological, nuclear ribosomal (ITS) and chloroplast (*trnL-F*) evidence. *Molecular Phylogenetics and Evolution* **20**: 41–64.
- Friesen N, Fritsch RM, Pollner S, Blattner F. 2000. Molecular and morphological evidence for an origin of the aberrant genus *Milula* within Himalayan species of *Allium* (Alliaceae). *Molecular Phylogenetics and Evolution* **17**: 209–218.
- García-Jacas N, Susanna A, Garnatje T, Vilatersana R. 2001. Generic delimitation and phylogeny of the subtribe Centaureinae (Asteraceae): a combined nuclear and chloroplast DNA analysis. *Annals of Botany* **87**: 503–515.
- García-Jacas N, Garnatje T, Susanna A, Vilatersana R. 2002. Tribal and subtribal delimitation and phylogeny of the Cardueae (Asteraceae): a combined nuclear and chloroplast DNA analysis. *Molecular Phylogenetics and Evolution* **22**: 51–64.
- Goertzen LR, Cannone JJ, Gutell RR, Jansen RK. 2003. ITS secondary structure derived from comparative analysis: implications for sequence alignment and phylogeny of the Asteraceae. *Molecular Phylogenetics and Evolution* **29**: 216–234.
- Goldmann N. 1993. Statistical tests of models of DNA substitution. *Journal of Molecular Evolution* **36**: 369–463.
- Graham A. 1996. A contribution to the geologic history of the Compositae. In: Hind DJN, Beentje HJ, eds. *Compositae: Systematics. Proceedings of the International Compositae Conference, Kew, 1994*. Kew: Royal Botanic Gardens, 123–140.
- Guo XG, He SP, Zhang YG. 2005. Phylogeny and biogeography of Chinese sisorid catfishes re-examined using mitochondrial cytochrome b and 16S rRNA gene sequences. *Molecular Phylogenetics and Evolution* **35**: 344–362.
- Häffner E. 2000. On the phylogeny of the subtribe Carduinae (Cardueae, Compositae). *Englera* **21**: 1–208.
- Häffner E, Hellwig FH. 1999. Phylogeny of the tribe Cardueae (Compositae) with emphasis on the subtribe Carduinae: an analysis based on ITS sequence data. *Willdenowia* **29**: 27–39.
- Harrison TM, Copeland P, Kidd WSF, Yin A. 1992. Raising Tibet. *Science* **255**: 1663–1670.
- Hellwig FH. 2004. Centaureinae (Asteraceae) in the Mediterranean-history of ecogeographical radiation. *Plant Systematics and Evolution* **246**: 137–162.
- Hershkovitz MA, Zimmer EA, Hahn WJ. 1999. Ribosomal DNA sequences and angiosperm systematics. In: Hollingsworth PM, Bateman RM, Gornall RJ eds. *Molecular systematics and plant evolution*. London: Taylor & Francis Press, 268–326.
- Hidalgo O, García-Jacas N, Garnatje T, Susanna A. 2006. Phylogeny of *Rhaponticum* (Asteraceae, Cardueae–Centaureinae) and related genera inferred from nuclear and chloroplast DNA sequence data: taxonomic and biogeographic implications. *Annals of Botany* **97**: 705–714.
- Huelsbeck JP, Ronquist F. 2001. MrBayes: Bayesian inference of phylogeny. *Bioinformatics* **17**: 754–755.
- Jansen RK, Kim KJ. 1996. Implications of chloroplast DNA data for the classification and phylogeny of the Asteraceae. In: Hind DJN, Beentje HJ, eds. *Compositae: Systematics. Proceedings of the International Compositae Conference, Kew, 1994*. Kew: Royal Botanic Gardens, 317–339.
- Kazmi SMA. 1963. Revision der Gattung *Carduus* (Compositae). *Mitteilungen der Botanischen Staatssammlung München* **5**: 139–198.
- Kazmi SMA. 1964. Revision der Gattung *Carduus* (Compositae). *Mitteilungen der Botanischen Staatssammlung München* **5**: 279–550.
- Kelch DG, Baldwin BG. 2003. Phylogeny and ecological radiation of New World thistles (*Cirsium*, Cardueae–Compositae) based on ITS and ETS rDNA sequence data. *Molecular Ecology* **12**: 141–151.
- Kim KJ, Choi KS, Jansen PK. 2005. Two chloroplast DNA inversions originated simultaneously during the early evolution of the sunflower family (Asteraceae). *Molecular Biology and Evolution* **22**: 1783–1792.

- Kimura M. 1980.** A simple method for estimating evolutionary rate of base substitutions through comparative studies of nucleotide sequences. *Journal of Molecular Evolution* **16**: 111–120.
- Kita Y, Fujikawa K, Ito M, Ohba H, Kato M. 2004.** Molecular phylogenetic analyses and systematics of the genus *Saussurea* and related genera (Asteraceae, Cardueae). *Taxon* **53**: 679–690.
- Kumar S, Tamura K, Nei M. 2004.** MEGA3: integrated software for Molecular Evolutionary Genetics Analysis and sequence alignment. *Briefings in Bioinformatics* **5**: 150–163.
- Li JJ, Shi YF, Li BY. 1995.** *Uplift of the Qinghai–Xizang (Tibet) plateau and global change*. Lanzhou: Lanzhou University Press.
- Li WH. 1997.** *Molecular evolution*. Sunderland, MA: Sinauer Associates.
- Ling Y. 1965.** Genera nova vel minus cognita familiae Compositarum, 1: *Vladimiria* Ilj., *Diplazoptilon* Ling et *Dolomiaea* DC. *Acta Phytotaxonomica Sinica* **10**: 75–91.
- Lipschitz SJ. 1979.** *Genus Saussurea DC. (Asteraceae)*. Leningrad: Nauka.
- Liu JQ, Chen ZD, Lu AM. 2000.** The phylogenetic relationships of *Sinodoxa*, revealed by the ITS data. *Acta Botanica Sinica* **42**: 656–658.
- Liu JQ, Chen ZD, Lu AM. 2001.** A preliminary study of the phylogeny of the Swertiaeae (Gentianaceae) based on ITS data. *Israel Journal of Plant Sciences* **43**: 301–308.
- Liu JQ, Gao TG, Chen ZD, Lu AM. 2002.** Molecular phylogeny and biogeography of the Qinghai–Tibet plateau endemic *Nannoglottis* (Asteraceae). *Molecular Phylogenetics and Evolution* **23**: 307–325.
- Liu JQ, Wang YJ, Wang AL, Ohba H, Abbott RJ. 2006.** Radiation and diversification within the *Ligularia–Cremnathodium–Parasenecio* complex (Asteraceae) triggered by uplift of the Qinghai–Tibetan Plateau. *Molecular Phylogenetics and Evolution* **38**: 31–49.
- Liu SW. 1996.** *Qinghai Flora*, Vol. 3. Xining: Qinghai People Press, 437–441.
- Luo J, Yang DM, Suzukic H, Wang YX, Chen WJ, Campbell KL, Zhang YP. 2004.** Molecular phylogeny and biogeography of Oriental voles: genus *Eothenomys* (Muridae, Mammalia). *Molecular Phylogenetics and Evolution* **33**: 349–362.
- Martins L, Hellwig FH. 2005a.** Systematic position of the genera *Serratula* and *Klasea* within Centaureinae (Cardueae, Asteraceae) and new combinations in *Klasea*. *Taxon* **54**, 632–638.
- Martins L, Hellwig FH. 2005b.** Phylogenetic relationships of the enigmatic species *Serratula chinensis* and *Serratula forrestii* (Asteraceae-Cardueae). *Plant Systematics and Evolution* **255**, 215–224.
- Menke B. 1976.** Pliozäne und ältestquartäre Sporen- und Pollenflora von Schleswig-Holstein. *Geologisches Jahrbuch*, A **32**: 3–197.
- Milne RI. 2004.** Phylogeny and biogeography of *Rhododendron* subsection *Pontica*, a group with a Tertiary relict distribution. *Molecular Phylogenetics and Evolution* **33**: 389–401.
- Myers N, Mittermeier RA, Mittermeier CG, da Fonseca GAB, Kent J. 2000.** Biodiversity hotspots for conservation priorities. *Nature* **403**: 853–858.
- O’Hanlon PC, Peakall R. 2000.** A simple method for the detection of size homoplasy among amplified fragment length polymorphism fragments. *Molecular Ecology* **9**: 815–816.
- Pang JF, Wang YZ, Zhong Y, Hoelzel AR, Papenfuss TJ, Zeng XM, et al. 2003.** A phylogeny of Chinese species in the genus *Phrynocephalus* (Agamidae) inferred from mitochondrial DNA sequences. *Molecular Phylogenetics and Evolution* **27**: 398–409.
- Panero JL, Funk VA. 2002.** Toward a phylogenetic subfamily classification for the Compositae (Asteraceae). *Proceedings of Biological Society Washington* **115**, 909–922.
- Pennington RT, Cronk QCB, Richardson JA. 2004a.** Introduction and synthesis: plant phylogeny and the origin of major biomes. *Philosophical Transactions of the Royal Society B: Biological Sciences* **359**, 1455–1464.
- Pennington RT, Lavin M, Prado DE, Pendry CA, Pell SK, Butterworth CA. 2004b.** Historical climate change and speciation: neotropical seasonally dry forest plants show patterns of both Tertiary and Quaternary diversification. *Philosophical Transactions of the Royal Society B: Biological Sciences* **359**, 515–538.
- Petit DP. 1997.** Generic interrelationships of the Cardueae (Compositae): a cladistic analysis of morphological data. *Plant Systematics and Evolution* **207**: 173–203.
- Petit DP, Mathez J, Qaid A. 1996.** Early differentiation of the Cardueae sensu lato: morphology and pollen. In: Hind DJN, Beentje HJ, eds. *Compositae: Systematics. Proceedings of the International Compositae Conference, Kew, 1994*. Kew: Royal Botanic Gardens, 79–93.
- Posada D, Crandall KA. 1998.** ModelTest: testing the model of DNA substitution. *Bioinformatics* **14**: 817–818.
- Raab-Straube EV. 2003.** Phylogenetic relationships in *Saussurea* (Compositae, Cardueae) sensu lato, inferred from morphological, ITS and *trnL-trnF* sequence data with a synopsis of *Himalaiella* gen. nov., *Lipschitzia* and *Frolovia*. *Willdenowia* **33**: 379–402.
- Sanderson MJ. 2002.** Estimating absolute rates of molecular evolution and divergence times: a penalized likelihood approach. *Molecular Biology and Evolution* **19**: 101–109.
- Sang T, Crawford DJ, Stuessy TF. 1997.** Chloroplast DNA phylogeny, reticulate evolution, and biogeography of *Paeonia* (Paeoniaceae). *American Journal of Botany* **84**: 1120–1136.
- Shi YF, Li JJ, Li BY. 1998.** *Uplift and environmental changes of Qinghai–Tibetan Plateau in the late Cenozoic*. Guangzhou: Guangdong Science and Technology Press.
- Shi Z. 1986.** On circumscription of the genus *Dolomiaea* DC. *Acta Phytotaxonomica Sinica* **24**: 292–296.
- Shi Z. 1987.** Echinopsidae and Cynareae. In: *Flora Republicae Popularis Sinicae*, Vol. 78 (1). Beijing: Science Press, 1–226.
- Shi Z. 1994.** A new species of *Dolomiaea* DC. from Xizang. *Acta Phytotaxonomica Sinica* **32**: 190–192.
- Shi Z, Jin SY. 1983.** Notulae de plantis tribus Cynarearum familiae Compositarum florum Sinicae (1). *Acta Phytotaxonomica Sinica* **21**: 89–93.
- Smith WW. 1917.** Diagnoses specierum novarum in herbario Horti Regii Botanici Edinburgensis cognitarum (species asiaticae). *Notes from the Royal Botanic Garden Edinburgh* **10**: 1–78.
- Soltis PS, Soltis DE, Savolainen V, Crane PR, Barraclough TG. 2002.** Rate heterogeneity among lineages of tracheophytes: integration of molecular and fossil data and evidence for molecular living fossils. *Proceedings of the National Academy of Sciences of the USA* **99**: 4430–4435.
- Spicer R, Harris N, Widdowson M, Herman A, Guo S, Valdes P, et al. 2003.** Constant elevation of southern Tibet over the past 15 million years. *Nature* **421**: 622–624.
- Susanna A, García-Jacas N, Hidalgo O, Vilatersana R, Garnatje T. 2006.** The Cardueae (Compositae) revisited: insights from ITS, *trnL-trnF*, and *matK* nuclear and chloroplast DNA analysis. *Annals of the Missouri Botanical Garden* **93**: 150–171.
- Susanna A, García-Jacas N, Soltis DE, Soltis PS. 1995.** Phylogenetic relationships in tribe Cardueae (Asteraceae) based on ITS sequences. *American Journal of Botany* **82**: 1056–1068.
- Susanna A, Garnatje T, García-Jacas N. 1999.** Molecular phylogeny of *Cheirolophus* (Asteraceae: Cardueae-Centaureinae) based on ITS sequences of nuclear ribosomal DNA. *Plant Systematics and Evolution* **214**: 147–160.
- Swofford DL. 2003.** *PAUP\*. Phylogenetic analysis using parsimony (\*and other methods), Version 4*. Sunderland, MA: Sinauer Associates.
- Taberlet PT, Gielly L, Patou G, Bouvet J. 1991.** Universal primers for amplification of three non-coding regions of chloroplast DNA. *Plant Molecular Biology* **17**: 1105–1109.
- Thompson JD, Gibson TJ, Plewinak F, Jeanmougin F, Higgins DG. 1997.** The Clustal-X windows interface: flexible strategies for multiple sequence alignment aided by quality analysis tools. *Nucleic Acids Research* **25**: 4876–4882.
- Wagenitz G. 1976.** Systematics and phylogeny of the Compositae (Asteraceae). *Plant Systematics and Evolution* **125**: 29–46.
- Wang YJ, Liu JQ. 2004a.** A preliminary investigation on the phylogeny of *Saussurea* (Asteraceae: Cardueae) based on chloroplast DNA *trnL-F* sequences. *Acta Phytotaxonomica Sinica* **42**: 136–153.
- Wang YJ, Liu JQ. 2004b.** Phylogenetic analyses of *Saussurea* sect. *Pseudoeriocoryne* (Asteraceae: Cardueae) based on chloroplast DNA *trnL-F* sequences. *Biochemical Systematics and Ecology* **32**: 1009–1023.

- Wang YJ, Li XJ, Hao G, Liu JQ. 2004.** Molecular phylogeny and biogeography of *Androsace* (Primulaceae) and the convergent evolution of cushion morphology. *Acta Phytotaxonomica Sinica* **42**: 481–499.
- Wang AL, Yang MH, Liu JQ. 2005a.** Molecular phylogeny, recent radiation and evolution of gross morphology of the rhubarb genus *Rheum* (Polygonaceae) inferred from chloroplast DNA *trnL-F* sequences. *Annals of Botany* **96**: 489–498.
- Wang YJ, Pan JT, Liu SW, Liu JQ. 2005b.** A new species of *Saussurea* (Asteraceae) from Tibet in west China and its systematic position according to ITS sequence analysis. *Botanical Journal of the Linnean Society* **147**: 349–356.
- White TJ, Bruns T, Lee S, Taylor J. 1990.** Amplification and direct sequencing of fungal ribosomal RNA genes for phylogenetics. In: Innis MA, Gelfand DH, Sninsky JJ, White TJ, eds. *PCR protocols. A guide to methods and applications*. San Diego: Academic Press, 315–322.
- Wilson EO. 1992.** *The diversity of life*. Cambridge, MA: Harvard University Press.
- Wu CY. 1987.** *Flora Xizangica*, Vol. 5. Beijing: Science Press, 874–902.
- Wu CY, Lu AM, Tang YC, Chen ZD, Li DZ. 2003.** *The families and genera of angiosperms in China: a comprehensive analysis*. Beijing: Science Press, 894.
- Wu SG, Yang Y, Fei Y. 1995.** On the flora of the alpine region in the Qinghai–Xizang (Tibet) Plateau. *Acta Botanica Yunnanica* **17**: 233–250.
- Wulff EV. 1943.** *An introduction to historical plant geography*. Waltham, MA: Chronica Botanica Company.
- Yang FS, Wang XQ, Hong DY. 2003.** Unexpected high divergence in nrDNA ITS and extensive parallelism in floral morphology of *Pedicularis* (Orobanchaceae). *Plant Systematics and Evolution* **240**: 91–105.
- Ying TS, Zhang YL. 1994.** *The endemic genera of seed plants of China*. Beijing: Science Press.
- Yu N, Zheng CL, Zhang YP, Li WH. 2000.** Molecular systematics of pikas (genus *Ochotona*) inferred from mitochondrial DNA sequences. *Molecular Phylogenetics and Evolution* **16**: 85–95.
- Yuan YM, Kupfer P. 1997.** The monophyly and rapid evolution of *Gentiana* sect. *Chondrophyllae* Bunge s.l. (Gentianaceae): evidence from the nucleotide sequences of the internal transcribed spacers of nuclear ribosomal DNA. *Botanical Journal of the Linnean Society* **123**: 25–43.
- Zheng D. 1996.** The system of physico-geographical regions of the Qinghai-Tibet (Xizang) Plateau. *Science in China Series D, Earth Sciences* **39**: 410–417.
